# Supplementary material for: A series of 2-D and 3-D silver(i) coordination polymers constructed from a new angular-shaped di-2-pyrazinylsulfide: role of anions in molecular construction
Source: Royal Society of Chemistry journal article supplement (doi:10.1039/c3ce42404a), 2014-01-01
Supplement: c3ce42404a.pdf [file c3ce42404a.pdf]

**Supplementary Material (ESI) for CrystEngComm**

**A series of 2-D and 3-D silver(I) coordination polymers constructed from a new angular-shaped di-2-pyrazinylsulfide: role of anions in molecular construction**

Chong-Qing Wan\*, Ya Zhang, Xin-Zhan Sun, and Hao-Jie Yan

*Beijing Key Laboratory for Optical Materials and Photonic Devices, Department of Chemistry, Capital Normal University, Beijing 100048, P. R. China.*

\* Correspondence author

E-mail: wancq@cnu.edu.cn

Tel.: + 0086-010-68903033-802

Fax: + 0086-010-68902320

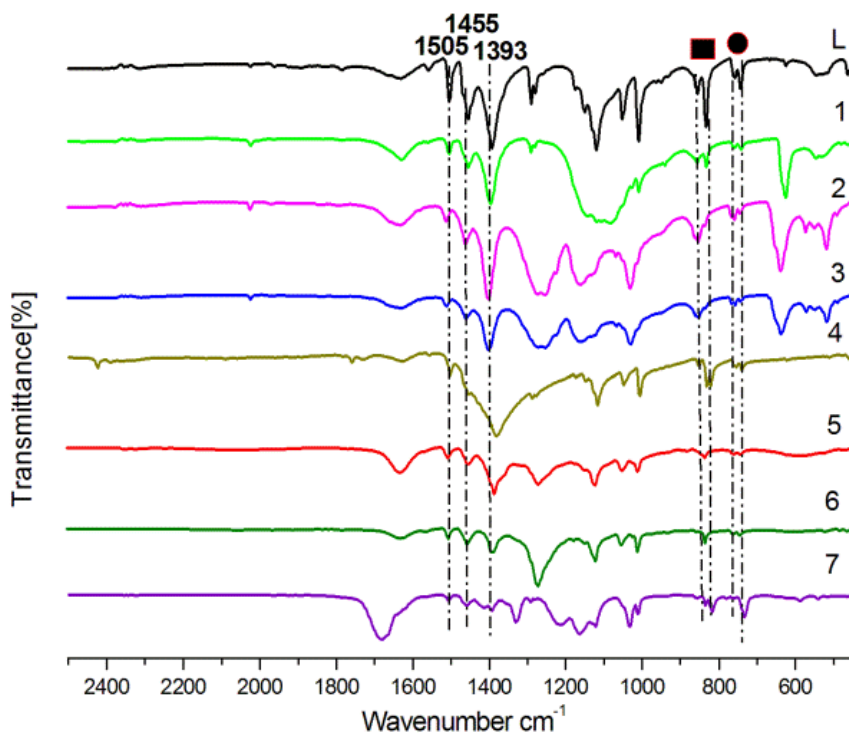

**Fig. S1** FTIR spectra of DpzS (L) and complexes **1-7**. and denote double bands around 841~861 cm<sup>-1</sup> and 730~756 cm<sup>-1</sup>, respectively.

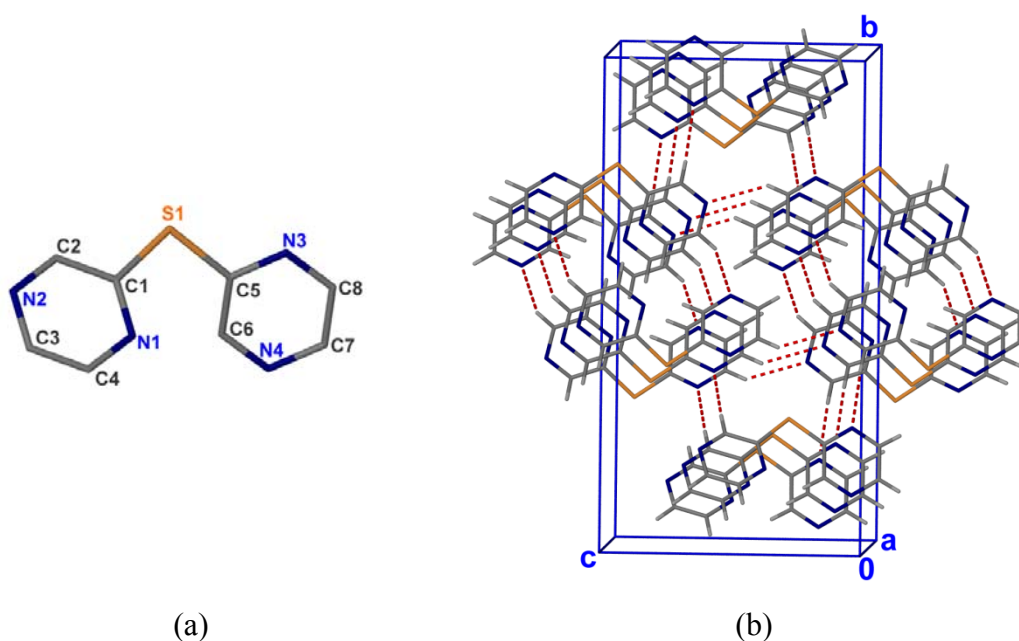

**Fig. S2** (a) Structure of DpzS. Selected bond lengths: S1–C5 1.763(2) Å, S1–C1 1.765(2) Å; C5–S1–C1 angle 104.28(8)°. (b) Intermolecular C-H...N interactions of DpzS, with π...π interactions omitted for clarity.

Di-2-pyrazinylsulfide (DpzS) was found reported very recently in Z. Kristallogr. New Cryst.Struct. (2013), 228(3), 325-326, doi: 10.1524/ncrs.2013.0158 by Dr. Jia *et al*, the crystallographic data of which exhibit slightly different from that in this study. The selected crystallographic data of the DpzS Ligand herein are listed as following: Empirical formula, C<sub>8</sub>H<sub>6</sub>N<sub>4</sub>S, *M* = 190.23, Monoclinic, space group *P*2<sub>1</sub>/*n*, *a* = 3.90610(1) Å, *b* = 20.4757(3) Å, *c* = 10.6097(2) Å,  $\alpha = 90^\circ$ ,  $\beta = 98.4360(1)^\circ$ ,  $\gamma = 90^\circ$ , *V* = 839.38 Å<sup>3</sup>, *Z* = 4, *D*<sub>c</sub> = 1.505 g mm<sup>-3</sup>,  $\mu(\text{Mo-K}\alpha) = 0.337 \text{ mm}^{-1}$ , 2017 unique (*R*<sub>int</sub> = 0.0387) and 1469 observed (*I* > 2σ(*I*)) reflections, *R*1 = 0.0405, *wR*2 = 0.1178, *S* = 1.091. Herein, the value of the C–S–C bond angle of DpzS is 104.28(8)° with the dihedral angle between the pair of pyrazinyl rings equaling 48.54(3)°, a typical angular configuration (Fig. S2). Such angular-shaped molecules are arranged along the *a* axis through intermolecular π(pyrazinyl)⋯π(pyrazinyl) interactions (centroid⋯centroid = 3.906(2) Å) to form a column arrangement, which are parallel and stacked to form a three-dimensional (3-D) framework through intermolecular C–H⋯N hydrogen bonding interactions (C2–H⋯N3a: D⋯A 3.515(2) Å, D–H⋯A 171.9°; C3–H⋯N4b: D⋯A 3.511(3) Å, D–H⋯A 114.2°; C8–H⋯N2c: D⋯A 3.364(2) Å, D–H⋯A 137.7°. Symmetry codes: a *x* – 1/2, –*y* + 1/2, *z* + 1/2; b –*x*, –*y*, –*z*+1; c *x*, *y*, *z* – 1), as shown in Fig. S2b.

**Table S1.** Selected bond lengths and bond angles in DpzS and complexes **1-7**.

|             | Bond       | d, Å      | Angle            | ω, deg    |
|-------------|------------|-----------|------------------|-----------|
| <b>DpzS</b> | S(1)-C(5)  | 1.7626(2) | C(5)-S(1)-C(1)   | 104.28(8) |
|             | S(1)-C(1)  | 1.7648(2) | C(5)-N(3)-C(8)   | 115.82(2) |
|             | C(2)-N(2)  | 1.320(2)  | C(6)-N(4)-C(7)   | 116.15(2) |
|             | C(4)-N(1)  | 1.331(2)  | N(1)-C(1)-C(2)   | 121.53(2) |
|             | N(3)-C(5)  | 1.332(2)  | N(1)-C(1)-S(1)   | 121.47(1) |
|             | N(3)-C(8)  | 1.332(2)  | C(2)-C(1)-S(1)   | 116.97(1) |
|             | N(4)-C(6)  | 1.319(2)  | C(4)-N(1)-C(1)   | 115.78(1) |
|             | N(4)-C(7)  | 1.336(2)  | C(2)-N(2)-C(3)   | 116.05(2) |
|             | C(1)-N(1)  | 1.331(2)  | N(3)-C(5)-C(6)   | 121.51(2) |
|             | C(3)-N(2)  | 1.337(3)  | N(3)-C(5)-S(1)   | 114.33(1) |
|             |            |           | C(6)-C(5)-S(1)   | 124.03(1) |
|             | Bond       | d, Å      | Angle            | ω, deg    |
| <b>1</b>    | Ag(1)-N(2) | 2.411(5)  | N(2)-Ag(1)-N(2)a | 99.1(2)   |

|          |                                                                                                                                              |             |                   |                                 |
|----------|----------------------------------------------------------------------------------------------------------------------------------------------|-------------|-------------------|---------------------------------|
|          | Ag(2)-N(1)                                                                                                                                   | 2.426(4)    | N(1)-Ag(2)-N(1)b  | 159.7(2)                        |
|          | Ag(2)-Ag(3)                                                                                                                                  | 2.9918(1)   | N(1)-Ag(2)-Ag(3)  | 79.85(1)                        |
|          | Ag(3)-O(6)                                                                                                                                   | 2.464(7)    | O(6)bAg(3)-O(6)   | 112.0(4)                        |
|          | Ag(3)-S(1)                                                                                                                                   | 2.507(2)    | O(6)bAg(3)-S(1)b  | 96.52(4)                        |
|          | N(1)-C(1)                                                                                                                                    | 1.321(7)    | S(1)bAg(3)-S(1)   | 156.56(1)                       |
|          | N(1)-C(4)                                                                                                                                    | 1.340(7)    | O(6)Ag(3)-Ag(2)   | 124.01(2)                       |
|          | N(2)-C(3)                                                                                                                                    | 1.321(7)    | S(1)-Ag(3)-Ag(2)  | 78.28(5)                        |
|          | N(2)-C(2)                                                                                                                                    | 1.328(7)    | C(1)-N(1)-Ag(2)   | 121.1(4)                        |
|          | S(1)-C(1)                                                                                                                                    | 1.790(5)    | C(4)-N(1)-Ag(2)   | 122.6(4)                        |
|          |                                                                                                                                              |             | C(3)-N(2)-Ag(1)   | 120.9(4)                        |
|          |                                                                                                                                              |             | C(2)-N(2)-Ag(1)   | 122.5(4)                        |
|          |                                                                                                                                              |             | C(1)-S(1)-Ag(3)   | 104.37(2)                       |
|          | Symmetry codes: a $x, -y + 3/2, z$ ; b $-x + 1, -y + 1/2, z$                                                                                 |             |                   |                                 |
|          | <b>Bond</b>                                                                                                                                  | <b>d, Å</b> | <b>Angle</b>      | <b><math>\omega</math>, deg</b> |
| <b>2</b> | Ag(1)-N(2)                                                                                                                                   | 2.2661(2)   | N(2)a-Ag(1)-N(2)  | 141.29(1)                       |
|          | Ag(2)-N(1)                                                                                                                                   | 2.2229(2)   | N(1)-Ag(2)-N(4)b  | 144.60(7)                       |
|          | Ag(2)-N(4)b                                                                                                                                  | 2.2981(2)   | N(1)-Ag(2)-N(3)c  | 131.74(7)                       |
|          | Ag(2)-N(3)c                                                                                                                                  | 2.4352(2)   | N(4)b-Ag(2)-N(3)c | 83.48(6)                        |
|          | S(1)-C(1)                                                                                                                                    | 1.755(2)    | C(1)-S(1)-C(5)    | 105.41(1)                       |
|          | S(1)-C(5)                                                                                                                                    | 1.771(2)    | C(4)-N(1)-Ag(2)   | 121.18(1)                       |
|          |                                                                                                                                              |             | C(1)-N(1)-Ag(2)   | 120.45(1)                       |
|          |                                                                                                                                              |             | C(3)-N(2)-Ag(1)   | 115.67(2)                       |
|          |                                                                                                                                              |             | C(2)-N(2)-Ag(1)   | 126.97(1)                       |
|          |                                                                                                                                              |             | C(5)-N(3)-Ag(2)c  | 112.89(1)                       |
|          |                                                                                                                                              |             | C(8)-N(3)-Ag(2)c  | 131.06(2)                       |
|          |                                                                                                                                              |             | C(7)-N(4)-Ag(2)e  | 122.46(2)                       |
|          |                                                                                                                                              |             | C(6)-N(4)-Ag(2)e  | 119.08(2)                       |
|          | Symmetry codes: a $-x + 1, y, -z + 1/2$ ; b $x, -y, z + 1/2$ ; c $-x + 1/2, -y + 1/2, -z + 1$ ; d $-x + 1, y, -z + 3/2$ ; e $x, -y, z - 1/2$ |             |                   |                                 |
|          | <b>Bond</b>                                                                                                                                  | <b>d, Å</b> | <b>Angle</b>      | <b><math>\omega</math>, deg</b> |
| <b>3</b> | Ag(1)-N(7)c                                                                                                                                  | 2.254(5)    | N(7)a-Ag(1)-O(1W) | 132.4(2)                        |
|          | Ag(1)-O(1W)                                                                                                                                  | 2.352(6)    | N(7)a-Ag(1)-N(1)  | 120.0(2)                        |
|          | Ag(1)-N(1)                                                                                                                                   | 2.376(6)    | O(1W)-Ag(1)-N(1)  | 96.1(2)                         |
|          | Ag(1)-O(2W)                                                                                                                                  | 2.419(6)    | N(7)a-Ag(1)-O(2W) | 125.52(2)                       |

|             |           |                   |           |
|-------------|-----------|-------------------|-----------|
| Ag(2)-N(8)b | 2.242(5)  | O(1W)-Ag(1)-O(2W) | 82.0(2)   |
| Ag(2)-N(3)  | 2.265(5)  | N(1)-Ag(1)-O(2W)  | 88.1(2)   |
| Ag(2)-O(9)  | 2.401(17) | N(8)b-Ag(2)-N(3)  | 146.5(2)  |
| Ag(2)-N(6)  | 2.403(6)  | N(8)b-Ag(2)-O(9)  | 94.7(6)   |
| Ag(3)-N(2)c | 2.274(6)  | N(3)-Ag(2)-O(9)   | 105.1(7)  |
| Ag(3)-N(5)  | 2.302(6)  | N(3)-Ag(2)-N(6)   | 104.3(2)  |
| Ag(3)-N(4)d | 2.402(5)  | O(9)-Ag(2)-N(6)   | 89.4(6)   |
|             |           | N(2)c-Ag(3)-N(5)  | 152.94(2) |
|             |           | N(2)c-Ag(3)-N(4)d | 105.9(2)  |
|             |           | N(5)-Ag(3)-N(4)d  | 95.93(2)  |
|             |           | C(5)-S(1)-C(1)    | 102.3(3)  |
|             |           | C(13)-S(2)-C(9)   | 102.0(3)  |
|             |           | C(2)-N(2)-Ag(3)c  | 123.5(4)  |
|             |           | C(3)-N(2)-Ag(3)c  | 119.1(5)  |
|             |           | C(7)-N(4)-Ag(3)e  | 120.8(4)  |
|             |           | C(6)-N(4)-Ag(3)e  | 122.3(4)  |
|             |           | C(13)-N(7)-Ag(1)f | 120.0(4)  |
|             |           | C(16)-N(7)-Ag(1)f | 123.3(4)  |
|             |           | C(14)-N(8)-Ag(2)b | 120.8(4)  |
|             |           | C(15)-N(8)-Ag(2)b | 123.2(4)  |

Symmetry codes: a  $x + 1, y - 1, z$ ; b  $-x + 1, -y + 1, -z + 2$ ; c  $-x + 1, -y + 1, -z + 1$ ; d  $x - 1, y, z$ ; e  $x + 1, y, z$ ; f  $x - 1, y + 1, z$

|          | Bond        | d, Å     | Angle             | $\omega$ , deg |
|----------|-------------|----------|-------------------|----------------|
| <b>4</b> | Ag(1)-N(4)a | 2.280(4) | N(4)a-Ag(1)-N(1)  | 117.83(1)      |
|          | Ag(1)-N(1)  | 2.358(4) | N(4)a-Ag(1)-O(1W) | 107.01(2)      |
|          | Ag(1)-O(1W) | 2.363(4) | N(1)-Ag(1)-O(1W)  | 113.00(2)      |
|          | Ag(1)-N(3)b | 2.392(4) | N(4)a-Ag(1)-N(3)b | 126.68(1)      |
|          | Ag(2)-N(2)  | 2.244(4) | N(1)-Ag(1)-N(3)b  | 101.21(1)      |
|          | Ag(2)-O(2)  | 2.429(4) | O(1W)-Ag(1)-N(3)b | 87.29(2)       |
|          | Ag(2)-O(3)  | 2.536(4) | N(2)-Ag(2)-O(2)   | 157.99(1)      |
|          | Ag(2)-O(4)  | 2.538(4) | N(2)-Ag(2)-O(3)   | 143.41(1)      |
|          | S(1)-C(1)   | 1.765(4) | O(2)-Ag(2)-O(3)   | 51.08(1)       |
|          | S(1)-C(5)   | 1.772(5) | N(2)-Ag(2)-O(4)   | 106.05(2)      |
|          |             |          | O(2)-Ag(2)-O(4)   | 87.11(2)       |

|          |                                                                                                                 |                  |                   |           |
|----------|-----------------------------------------------------------------------------------------------------------------|------------------|-------------------|-----------|
|          |                                                                                                                 | O(3)-Ag(2)-O(4)  | 90.55(2)          |           |
|          |                                                                                                                 | C(1)-S(1)-C(5)   | 102.6(2)          |           |
|          |                                                                                                                 | C(4)-N(1)-Ag(1)  | 128.0(3)          |           |
|          |                                                                                                                 | C(1)-N(1)-Ag(1)  | 114.2(3)          |           |
|          |                                                                                                                 | C(5)-N(3)-Ag(1)c | 120.3(3)          |           |
|          |                                                                                                                 | C(8)-N(3)-Ag(1)c | 123.9(3)          |           |
|          |                                                                                                                 | C(6)-N(4)-Ag(1)d | 122.9(3)          |           |
|          |                                                                                                                 | C(7)-N(4)-Ag(1)d | 120.5(3)          |           |
|          |                                                                                                                 | N(5)-O(2)-Ag(2)  | 96.6(3)           |           |
|          |                                                                                                                 | N(5)-O(3)-Ag(2)  | 92.4(3)           |           |
|          |                                                                                                                 | N(6)-O(4)-Ag(2)  | 100.7(4)          |           |
|          | Symmetry codes: a $x,y,z + 1$ ; b $x + 1/2, -y + 1/2, z + 1/2$ ; c $x - 1/2, -y + 1/2, z - 1/2$ ; d $x,y,z - 1$ |                  |                   |           |
|          | <b>Bond</b>                                                                                                     | <b>d, Å</b>      | <b>Angle</b>      |           |
|          | <b>ω, deg</b>                                                                                                   |                  |                   |           |
| <b>5</b> | Ag(1)-N(3)                                                                                                      | 2.214(4)         | N(3)-Ag(1)-N(1)a  | 127.43(7) |
|          | Ag(1)-N(1)                                                                                                      | 2.3996(2)        | N(3)-Ag(1)-N(1)   | 127.43(7) |
|          | S(1)-C(1)                                                                                                       | 1.783(2)         | N(1)a-Ag(1)-N(1)  | 82.90(9)  |
|          | O(1)-N(3)                                                                                                       | 1.207(3)         | C(1)b-S(1)-C(1)   | 100.67(1) |
|          | N(1)-C(1)                                                                                                       | 1.332(3)         | C(1)-N(1)-C(4)    | 116.31(2) |
|          | N(1)-C(4)                                                                                                       | 1.338(3)         | C(1)-N(1)-Ag(1)   | 121.55(1) |
|          | N(2)-C(3)                                                                                                       | 1.329(3)         | C(4)-N(1)-Ag(1)   | 121.57(2) |
|          | N(2)-C(2)                                                                                                       | 1.336(4)         | C(3)-N(2)-C(2)    | 116.3(2)  |
|          |                                                                                                                 |                  | O(1)-N(3)-Ag(1)   | 119.7(2)  |
|          | Symmetry codes: a $x, -y + 1/2, z$                                                                              |                  |                   |           |
|          | <b>Bond</b>                                                                                                     | <b>d, Å</b>      | <b>Angle</b>      |           |
|          | <b>ω, deg</b>                                                                                                   |                  |                   |           |
| <b>6</b> | Ag(1)-N(2)                                                                                                      | 2.274(3)         | N(2)-Ag(1)-N(4)a  | 123.72(1) |
|          | Ag(1)-N(4)a                                                                                                     | 2.349(4)         | N(2)-Ag(1)-O(1)b  | 140.15(2) |
|          | Ag(1)-O(1)b                                                                                                     | 2.380(5)         | N(4)a-Ag(1)-O(1)b | 95.64(2)  |
|          | Ag(1)-N(5)                                                                                                      | 2.635(4)         | N(2)-Ag(1)-N(5)   | 89.27(1)  |
|          | Ag(2)-O(2)c                                                                                                     | 2.353(5)         | N(4)a-Ag(1)-N(5)  | 86.65(1)  |
|          | Ag(2)-O(4)d                                                                                                     | 2.374(4)         | O(1)b-Ag(1)-N(5)  | 86.92(2)  |
|          | Ag(2)-N(3)                                                                                                      | 2.461(4)         | O(2)c-Ag(2)-O(4)d | 127.07(2) |
|          | Ag(2)-N(1)b                                                                                                     | 2.557(4)         | O(2)c-Ag(2)-N(3)  | 138.05(2) |
|          | S(1)-C(1)                                                                                                       | 1.760(4)         | O(4)d-Ag(2)-N(3)  | 93.21(2)  |

|          |                                                                                                                                                                                                                                   |             |                    |                                 |
|----------|-----------------------------------------------------------------------------------------------------------------------------------------------------------------------------------------------------------------------------------|-------------|--------------------|---------------------------------|
|          | S(1)-C(5)                                                                                                                                                                                                                         | 1.773(4)    | O(2)c-Ag(2)-N(1)b  | 100.51(1)                       |
|          |                                                                                                                                                                                                                                   |             | O(4)d-Ag(2)-N(1)b  | 89.78(1)                        |
|          |                                                                                                                                                                                                                                   |             | N(3)-Ag(2)-N(1)b   | 89.55(1)                        |
|          |                                                                                                                                                                                                                                   |             | C(1)-S(1)-C(5)     | 100.19(2)                       |
|          | Symmetry codes: a - $x + \frac{3}{2}$ , - $y + \frac{3}{2}$ , - $z + 1$ ; b - $x + 1$ , $y$ , - $z + \frac{1}{2}$ ; c - $x + 1$ , $y - 1$ , - $z + \frac{1}{2}$ ; d - $x + \frac{3}{2}$ , $y - \frac{1}{2}$ , - $z + \frac{1}{2}$ |             |                    |                                 |
|          | <b>Bond</b>                                                                                                                                                                                                                       | <b>d, Å</b> | <b>Angle</b>       | <b><math>\omega</math>, deg</b> |
| <b>7</b> | Ag(1)-O(2)a                                                                                                                                                                                                                       | 2.275(7)    | O(2)a-Ag(1)-N(1)   | 124.8(3)                        |
|          | Ag(1)-N(1)                                                                                                                                                                                                                        | 2.318(5)    | O(2)a-Ag(1)-N(3)b  | 102.2(2)                        |
|          | Ag(1)-N(3)b                                                                                                                                                                                                                       | 2.397(6)    | N(1)-Ag(1)-N(3)b   | 113.9(2)                        |
|          | Ag(1)-O(1)                                                                                                                                                                                                                        | 2.453(6)    | O(2)a-Ag(1)-O(1)   | 139.1(3)                        |
|          | Ag(1)-Ag(1)a                                                                                                                                                                                                                      | 3.3126(1)   | N(1)-Ag(1)-O(1)    | 88.4(2)                         |
|          | Ag(2)-N(2)                                                                                                                                                                                                                        | 2.294(6)    | N(3)b-Ag(1)-O(1)   | 81.1(2)                         |
|          | Ag(2)-O(3)                                                                                                                                                                                                                        | 2.403(9)    | O(2)a-Ag(1)-Ag(1)a | 92.8(2)                         |
|          | S(1)-C(1)                                                                                                                                                                                                                         | 1.753(6)    | N(1)-Ag(1)-Ag(1)a  | 95.37(1)                        |
|          | S(1)-C(5)                                                                                                                                                                                                                         | 1.782(7)    | N(3)b-Ag(1)-Ag(1)a | 128.65(2)                       |
|          |                                                                                                                                                                                                                                   |             | O(1)-Ag(1)-Ag(1)a  | 57.5(2)                         |
|          |                                                                                                                                                                                                                                   |             | N(4)c-Ag(2)-N(2)   | 118.9(2)                        |
|          |                                                                                                                                                                                                                                   |             | N(4)c-Ag(2)-O(3)   | 131.8(2)                        |
|          |                                                                                                                                                                                                                                   |             | N(2)-Ag(2)-O(3)    | 109.2(2)                        |
|          |                                                                                                                                                                                                                                   |             | C(1)-S(1)-C(5)     | 101.1(3)                        |
|          | Symmetry codes: a - $x + 1$ , $y$ , - $z + \frac{3}{2}$ ; b - $x + 1$ , - $y + 1$ , - $z + 1$                                                                                                                                     |             |                    |                                 |
